# Supplementary material
Source: PubMed Central journal article supplement (PMC6537965)
Supplement: 213-219-Appendix.pdf [file 213-219-Appendix.pdf]

| <b>Appendix A. Differences in vital parameters, blood gas, blood exams and need for haemodynamic support at admission (T0) and at 72 hours (T72h)</b> |                              |                              |          |
|-------------------------------------------------------------------------------------------------------------------------------------------------------|------------------------------|------------------------------|----------|
|                                                                                                                                                       | <b>AF group (n=9)</b>        | <b>SR group (n=18)</b>       |          |
|                                                                                                                                                       | <b>Mean (SD)</b>             | <b>Mean (SD)</b>             | <b>p</b> |
| MAP-T0 (mmHg)                                                                                                                                         | 100.22 (34.307)              | 94.50 (12.458)               | 1.000    |
| MAP-T72h (mmHg)                                                                                                                                       | 127.71 (17.64)               | 108.22 (14.91)               | 0.025    |
| FC-T0 (BPM)                                                                                                                                           | 91.44 (20.55)                | 88.74 (20.07)                | 0.938    |
| FC-T72h (BPM)                                                                                                                                         | 79.00 (22.93)                | 67.72 (14.09)                | 0.348    |
| Respiratory rate-T0                                                                                                                                   | 20.38 (4.60)                 | 17.50 (3.48)                 | 0.229    |
| Respiratory rate-T72h                                                                                                                                 | 19.00 (4.52)                 | 16.50 (3.66)                 | 0.301    |
| Temperature-T0 (°C)                                                                                                                                   | 35.76 (1.22)                 | 35.93 (1.03)                 | 0.833    |
| Temperature-T72h (°C)                                                                                                                                 | 36.13 (0.66)                 | 36.15 (0.57)                 | 0.695    |
| O <sub>2</sub> blood saturation-T0 (%)                                                                                                                | 96.09 (4.26)                 | 98.83 (1.35)                 | 0.111    |
| O <sub>2</sub> blood saturation-T72h (%)                                                                                                              | 98.37 (2.74)                 | 99.26 (0.76)                 | 0.582    |
| Arterial blood pH-T0                                                                                                                                  | 7.28 (0.15)                  | 7.33 (0.14)                  | 0.280    |
| Arterial blood pH-T72h                                                                                                                                | 7.37 (0.08)                  | 7.42 (0.08)                  | 0.115    |
| Arterial blood pO <sub>2</sub> -T0 (mmHg)                                                                                                             | 96.33 (44.88)                | 121.89 (48.54)               | 0.100    |
| Arterial blood pO <sub>2</sub> -T72h (mmHg)                                                                                                           | 124.43 (30.29)               | 132.06 (40.431)              | 0.762    |
| Arterial blood pCO <sub>2</sub> -T0 (mmHg)                                                                                                            | 46.11 (18.93)                | 41.56 (10.45)                | 0.817    |
| Arterial blood pCO <sub>2</sub> -T72h (mmHg)                                                                                                          | 42.57 (9.80)                 | 42.11 (6.53)                 | 0.715    |
| PaO <sub>2</sub> /FiO <sub>2</sub> -T0                                                                                                                | 179.78 (112.35)              | 262.66 (107.48)              | 0.040    |
| PaO <sub>2</sub> /FiO <sub>2</sub> -T72h                                                                                                              | 261.00 (102.06)              | 308.04 (109.68)              | 0.468    |
| Blood Na-T0 (mg dL <sup>-1</sup> )                                                                                                                    | 138.00 (3.97)                | 139.28 (5.70)                | 0.776    |
| Blood Na-T72h (mg dL <sup>-1</sup> )                                                                                                                  | 137.43 (1.90)                | 142.56 (3.84)                | 0.003    |
| Blood K-T0 (mg dL <sup>-1</sup> )                                                                                                                     | 4.11 (0.56)                  | 4.04 (0.65)                  | 0.680    |
| Blood K-T72h (mg dL <sup>-1</sup> )                                                                                                                   | 3.73 (0.38)                  | 3.60 (0.53)                  | 0.523    |
| Blood Cl-T0 (mg dL <sup>-1</sup> )                                                                                                                    | 103.65 (5.96)                | 105.89 (7.75)                | 0.469    |
| Blood Cl-T72h (mg dL <sup>-1</sup> )                                                                                                                  | 102.43 (4.03)                | 108.17 (3.48)                | 0.003    |
| Blood ionised Ca-T0 (mmol L <sup>-1</sup> )                                                                                                           | 0.88 (0.12)                  | 0.97 (0.18)                  | 0.189    |
| Blood ionised Ca-T72h (mmol L <sup>-1</sup> )                                                                                                         | 1.08 (0.17)                  | 1.05 (0.10)                  | 0.952    |
| Blood HCO <sub>3</sub> <sup>-</sup> -T0 (mmol L <sup>-1</sup> )                                                                                       | 21.756 (7.465)               | 22.983 (5.745)               | 0.959    |
| Blood HCO <sub>3</sub> <sup>-</sup> -T72h (mmol L <sup>-1</sup> )                                                                                     | 24.83 (2.44)                 | 27.73 (3.43)                 | 0.040    |
| Blood BE-T0 (mEq L <sup>-1</sup> )                                                                                                                    | -4.078 (9.669)               | -3.044 (7.518)               | 1.000    |
| Blood BE-T72h (mEq L <sup>-1</sup> )                                                                                                                  | 0.40 (3.02)                  | 3.46 (4.24)                  | 0.043    |
| Blood lactate-T0 (mmol L <sup>-1</sup> )                                                                                                              | 4.54 (3.33)                  | 3.23 (4.59)                  | 0.080    |
| Blood lactate-T72h (mmol L <sup>-1</sup> )                                                                                                            | 1.96 (1.44)                  | 1.29 (0.44)                  | 0.144    |
| Blood glucose-T0 (mg dL <sup>-1</sup> )                                                                                                               | 133.67 (39.51)               | 158.11 (55.53)               | 0.280    |
| Blood glucose-T72h (mg dL <sup>-1</sup> )                                                                                                             | 184.00 (60.00)               | 161.83 (43.66)               | 0.506    |
| Blood red cell-T0 (n)                                                                                                                                 | 3.56 ×10 <sup>6</sup> (0.60) | 3.50 ×10 <sup>6</sup> (0.50) | 0.940    |
| Blood red cell-T72h (n)                                                                                                                               | 3.50 ×10 <sup>6</sup> (0.41) | 3.42 ×10 <sup>6</sup> (0.36) | 0.716    |
| Haemoglobin-T0 (g dL <sup>-1</sup> )                                                                                                                  | 10.20 (1.67)                 | 9.85 (1.13)                  | 0.624    |
| Haemoglobin-T72h (g dL <sup>-1</sup> )                                                                                                                | 9.86 (0.37)                  | 9.87 (0.93)                  | 0.832    |
| Blood white cell-T0 (n)                                                                                                                               | 9975.56 (8196.74)            | 13234.44 (7855.78)           | 0.217    |
| Blood white cell-T72h (n)                                                                                                                             | 22834.57 (16091.87)          | 13130.83 (6405.40)           | 0.204    |
| Neutrophil-T0 (%)                                                                                                                                     | 78.56 (11.11)                | 81.46 (18.04)                | 0.217    |
| Neutrophil-T72h (%)                                                                                                                                   | 85.00 (9.40)                 | 82.99 (16.90)                | 0.545    |
| Lymphocyte-T0 (%)                                                                                                                                     | 11.37 (5.58)                 | 12.38 (18.71)                | 0.269    |
| Lymphocyte-T72h (%)                                                                                                                                   | 7.40 (4.47)                  | 10.95 (17.93)                | 0.809    |
| Platelets-T0 (n)                                                                                                                                      | 172.78 (159.40)              | 269.39 (142.54)              | 0.057    |

|                                              |                 |                  |       |
|----------------------------------------------|-----------------|------------------|-------|
| Platelets-T72h (n)                           | 173.43 (162.99) | 232.611 (130.48) | 0.183 |
| Blood creatinine-T0 (mg dL <sup>-1</sup> )   | 2.08 (1.55)     | 2.37 (2.17)      | 0.681 |
| Blood creatinine-T72h (mg dL <sup>-1</sup> ) | 1.87 (0.66)     | 1.57 (0.84)      | 0.348 |
| ALT-T0 (U L <sup>-1</sup> )                  | 56.11 (72.88)   | 29.00 (32.00)    | 0.410 |
| ALT-T72h (U L <sup>-1</sup> )                | 46.29 (51.55)   | 29.50 (32.03)    | 0.650 |
| AST-T0 (U L <sup>-1</sup> )                  | 42.44 (34.67)   | 35.67 (28.36)    | 0.571 |
| AST-T72h (U L <sup>-1</sup> )                | 32.00 (22.47)   | 30.11 (22.13)    | 0.880 |
| Total bilirubin-T0 (mg dL <sup>-1</sup> )    | 1.32 (1.31)     | 0.87 (0.77)      | 0.227 |
| Total bilirubin-T72h (mg dL <sup>-1</sup> )  | 1.34 (1.25)     | 0.98 (0.96)      | 0.226 |
| Direct bilirubin-T0 (mg dL <sup>-1</sup> )   | 1.02 (1.24)     | 0.64 (0.68)      | 0.382 |
| Direct bilirubin-T72h (mg dL <sup>-1</sup> ) | 1.00 (1.02)     | 0.74 (0.83)      | 0.275 |
| LDH-T0 (mg dL <sup>-1</sup> )                | 559.78 (660.82) | 205.44 (103.26)  | 0.014 |
| LDH-T72h (mg dL <sup>-1</sup> )              | 207.39 (66.86)  | 760.14 (784.42)  | 0.002 |
| CRP-T0 (mg dL <sup>-1</sup> )                | 16.65 (10.34)   | 21.16 (10.12)    | 0.293 |
| CPR-T72h (mg dL <sup>-1</sup> )              | 19.58 (36.52)   | 14.68 (8.28)     | 0.276 |
| PCT-T0 (mg dL <sup>-1</sup> )                | 20.20 (31.21)   | 17.84 (29.27)    | 0.918 |
| PCT-T72h (mg dL <sup>-1</sup> )              | 18.23 (36.52)   | 6.97 (5.70)      | 0.628 |
| Troponin-T0 (mg dL <sup>-1</sup> )           | 95.20 (117.62)  | 117.78 (158.64)  | 0.841 |
| Troponin-T72h (mg dL <sup>-1</sup> )         | 757.67 (843.63) | 92.667 (79.64)   | 0.606 |

Values are expressed as mean and standard deviation (SD) or as total number (N) where appropriate; p value was obtained using Mann-Whitney's non-parametric U test for continuous variable or Fisher's exact test for dichotomous variable. AF: atrial fibrillation; SR: sinus rhythm; MAP: mean arterial pressure; BE: base excess
